# Supplementary material
Source: PubMed Central journal article supplement (PMC7219515)

FIGURE LEGENDS

Supplemental Figure 1. Study flow chart of enrollment and outcomes of the trial

Journal Pre-proof

### Supplemental Tables

#### Supplemental Table 1. Characteristics of female subjects at screening\*

Data are presented as the number (%) or median (interquartile range).

|                                           | <b>Antioxidants (n=85)</b> | <b>Placebo (n=86)</b>   |
|-------------------------------------------|----------------------------|-------------------------|
| Age (years)                               | 31.0 (29.0, 35.0)          | 32.0 (29.0, 35.0)       |
| Body mass index (kg/m <sup>2</sup> )      | 23.8 (21.6, 27.7)          | 24.2 (22.2, 27.7), n=83 |
| Ethnicity                                 |                            |                         |
| Hispanic or Latino                        | 5 (5.9)                    | 7 (8.1)                 |
| Non-Hispanic                              | 77 (90.6)                  | 76 (88.4)               |
| Unknown                                   | 3 (3.5)                    | 3 (3.5)                 |
| Race                                      |                            |                         |
| White                                     | 69 (81.2)                  | 67 (77.9)               |
| Black                                     | 6 (7.1)                    | 7 (8.1)                 |
| Asian                                     | 8 (9.4)                    | 5 (5.8)                 |
| American Indian or Alaska Native          | 1 (1.2)                    | 0 (0.0)                 |
| Native Hawaiian or Other Pacific Islander | 0 (0)                      | 1 (1.2)                 |
| Unknown                                   | 0 (0)                      | 2 (2.3)                 |
| Mixed Race                                | 1 (1.2)                    | 4 (4.7)                 |

\* There were no significant differences (P<0.05) between the two groups.

**Supplemental Table 2. Plasma vitamin levels by treatment group**

| Visit                                       | Items                                   | Group       | N    | Mean  | Standard Deviation | Median | 25 <sup>th</sup> Percentile | 75 <sup>th</sup> Percentile |
|---------------------------------------------|-----------------------------------------|-------------|------|-------|--------------------|--------|-----------------------------|-----------------------------|
| Randomization<br>(Visit 1)                  | Selenium<br>(ug/L)                      | Total       | 124  | 160.3 | 19.8               | 156.5  | 146.0                       | 174.0                       |
|                                             |                                         | Antioxidant | 62   | 158.2 | 19.1               | 154.5  | 143.0                       | 170.0                       |
|                                             |                                         | Placebo     | 62   | 162.4 | 20.4               | 160.0  | 148.0                       | 176.0                       |
|                                             | Vit E- $\alpha$<br>Tocopherol<br>(mg/L) | Total       | 131  | 9.6   | 2.7                | 9.5    | 8.0                         | 10.7                        |
|                                             |                                         | Antioxidant | 64   | 9.7   | 2.8                | 9.6    | 8.1                         | 11.1                        |
|                                             |                                         | Placebo     | 67   | 9.6   | 2.7                | 9.5    | 7.8                         | 10.5                        |
|                                             | Vit E- $\gamma$<br>Tocopherol<br>(mg/L) | Total       | 131  | 1.3   | 0.7                | 1.2    | 0.8                         | 1.7                         |
|                                             |                                         | Antioxidant | 64   | 1.4   | 0.7                | 1.2    | 1.0                         | 1.7                         |
|                                             |                                         | Placebo     | 67   | 1.2   | 0.6                | 1.1    | 0.8                         | 1.7                         |
| Zinc<br>(ug/dL)                             | Total                                   | 128         | 89.3 | 12.1  | 88.0               | 81.5   | 96.0                        |                             |
|                                             | Antioxidant                             | 65          | 89.5 | 11.7  | 88.0               | 82.0   | 96.0                        |                             |
|                                             | Placebo                                 | 63          | 89.1 | 12.6  | 88.0               | 80.0   | 96.0                        |                             |
| After 3 months<br>of treatment<br>(Visit 3) | Selenium<br>(ug/L)                      | Total       | 124  | 189.6 | 37.1               | 186.0  | 156.5                       | 219.5                       |
|                                             |                                         | Antioxidant | 62   | 217.5 | 27.5               | 218.0  | 194.0                       | 235.0                       |
|                                             |                                         | Placebo     | 62   | 161.6 | 20.6               | 156.5  | 147.0                       | 172.0                       |
|                                             | Vit E- $\alpha$<br>Tocopherol<br>(mg/L) | Total       | 131  | 12.1  | 4.4                | 11.4   | 8.9                         | 14.2                        |
|                                             |                                         | Antioxidant | 64   | 14.8  | 4.3                | 14.0   | 12.0                        | 16.7                        |
|                                             |                                         | Placebo     | 67   | 9.4   | 2.5                | 9.1    | 7.6                         | 10.6                        |
|                                             | Vit E- $\gamma$<br>Tocopherol<br>(mg/L) | Total       | 131  | 0.9   | 0.6                | 0.8    | 0.5                         | 1.2                         |
|                                             |                                         | Antioxidant | 64   | 0.6   | 0.3                | 0.6    | 0.3                         | 0.8                         |
|                                             |                                         | Placebo     | 67   | 1.2   | 0.6                | 1.2    | 0.8                         | 1.4                         |
| Zinc<br>(ug/dL)                             | Total                                   | 128         | 90.6 | 14.2  | 89.0               | 82.5   | 98.0                        |                             |
|                                             | Antioxidant                             | 65          | 93.4 | 13.6  | 92.0               | 86.0   | 102.0                       |                             |
|                                             | Placebo                                 | 63          | 87.7 | 14.3  | 85.0               | 80.0   | 94.0                        |                             |
| Visit 3 –<br>Visit 1                        | Selenium<br>(ug/L)                      | Total       | 124  | 29.3  | 34.4               | 27.0   | -0.5                        | 60.0                        |
|                                             |                                         | Antioxidant | 62   | 59.3  | 20.1               | 60.0   | 44.0                        | 72.0                        |

|                                         |             |     |      |      |      |       |      |
|-----------------------------------------|-------------|-----|------|------|------|-------|------|
|                                         | Placebo     | 62  | -0.8 | 12.3 | -0.5 | -10.0 | 5.0  |
| Vit E- $\alpha$<br>Tocopherol<br>(mg/L) | Total       | 131 | 2.4  | 3.5  | 1.5  | -0.4  | 4.6  |
|                                         | Antioxidant | 64  | 5.1  | 2.9  | 4.7  | 3.4   | 6.8  |
|                                         | Placebo     | 67  | -0.2 | 1.4  | -0.2 | -1.1  | 0.8  |
| Vit E- $\gamma$<br>Tocopherol<br>(mg/L) | Total       | 131 | -0.4 | 0.7  | -0.4 | -0.8  | 0.1  |
|                                         | Antioxidant | 64  | -0.8 | 0.6  | -0.7 | -1.1  | -0.4 |
|                                         | Placebo     | 67  | 0.0  | 0.5  | 0.0  | -0.3  | 0.2  |
| Zinc<br>(ug/dL)                         | Total       | 128 | 1.3  | 12.6 | 1.5  | -5.5  | 8.0  |
|                                         | Antioxidant | 65  | 3.9  | 12.1 | 4.0  | -4.0  | 10.0 |
|                                         | Placebo     | 63  | -1.4 | 12.7 | -1.0 | -9.0  | 5.0  |

**Supplemental Table 3. Live birth rate by sperm morphology category or male prior pregnancy history status.**  
Data presented as number/total number (%).

|                            | <b>Antioxidants</b> | <b>Placebo</b> | <b>P value</b> |
|----------------------------|---------------------|----------------|----------------|
| Normal morphology          |                     |                |                |
| ≤4%                        | 3/33 (9.1)          | 5/19 (26.3)    | 0.124          |
| >4%                        | 7/30 (23.3)         | 13/44 (29.6)   | 0.555          |
| Missing                    | 3/22 (13.6)         | 3/23 (13.0)    | 1.000          |
| Fathered a prior pregnancy |                     |                |                |
| Yes                        | 2/25 (8.0)          | 9/38 (23.7)    | 0.176          |
| No                         | 11/60 (18.3)        | 12/48 (25.0)   | 0.400          |

**Supplemental Table 4. Adverse Events and Serious Adverse Events According to Treatment groups.  
Data are presented as the number (%)**

| Events                                     | Antioxidants (n=85) | Placebo (n=86) | p value |
|--------------------------------------------|---------------------|----------------|---------|
| <b>Overall adverse events for couples*</b> |                     |                |         |
| ≥1 Serious adverse event                   | 4 (4.7)             | 6 (7.0)        | 0.746   |
| ≥1 Adverse event                           | 51 (60.0)           | 59 (68.6)      | 0.240   |
| <b>Adverse events for males^</b>           |                     |                |         |
| Abdominal pain                             | 0 (0)               | 4 (4.7)        | 0.121   |
| Dyspepsia                                  | 4 (4.7)             | 2 (2.3)        | 0.443   |
| Headache                                   | 15 (17.6)           | 7 (8.1)        | 0.063   |
| Nasopharyngitis                            | 4 (4.7)             | 7 (8.1)        | 0.535   |
| Nausea                                     | 1 (1.2)             | 4 (4.7)        | 0.368   |
| Upper respiratory infection                | 4 (4.7)             | 4 (4.7)        | 1.000   |

\*Including any events from men, women, or fetus/infant.

^Including adverse events that were observed in at least 4% of men in any of the treatment groups.

**Supplemental Table 5. Pregnancy outcomes by treatment group (Per protocol analysis).**

Data presented as number/total number (%).

|                           | <b>Antioxidants</b> | <b>Placebo</b> | <b>P value</b> |
|---------------------------|---------------------|----------------|----------------|
| Live birth                | 13/67(19.4)         | 21/77(27.3)    | 0.267          |
| Singleton live birth      | 11/67(16.4)         | 16/77(20.8)    | 0.504          |
| Twin or triple live birth | 2/67(3.0)           | 5/77(6.5)      | 0.450          |
| Conception                | 18/67(26.9)         | 26/77(33.8)    | 0.370          |
| Phase I                   | 8/67(11.9)          | 8/77(10.4)     | 0.768          |
| Phase II                  | 10/67(14.9)         | 18/77(23.4)    | 0.201          |
| Clinical pregnancy        | 15/67(22.4)         | 22/77(28.6)    | 0.397          |
| Pregnancy loss            | 4/18 (22.2)         | 5/26 (19.2)    | 1.000          |

Journal Pre-proof



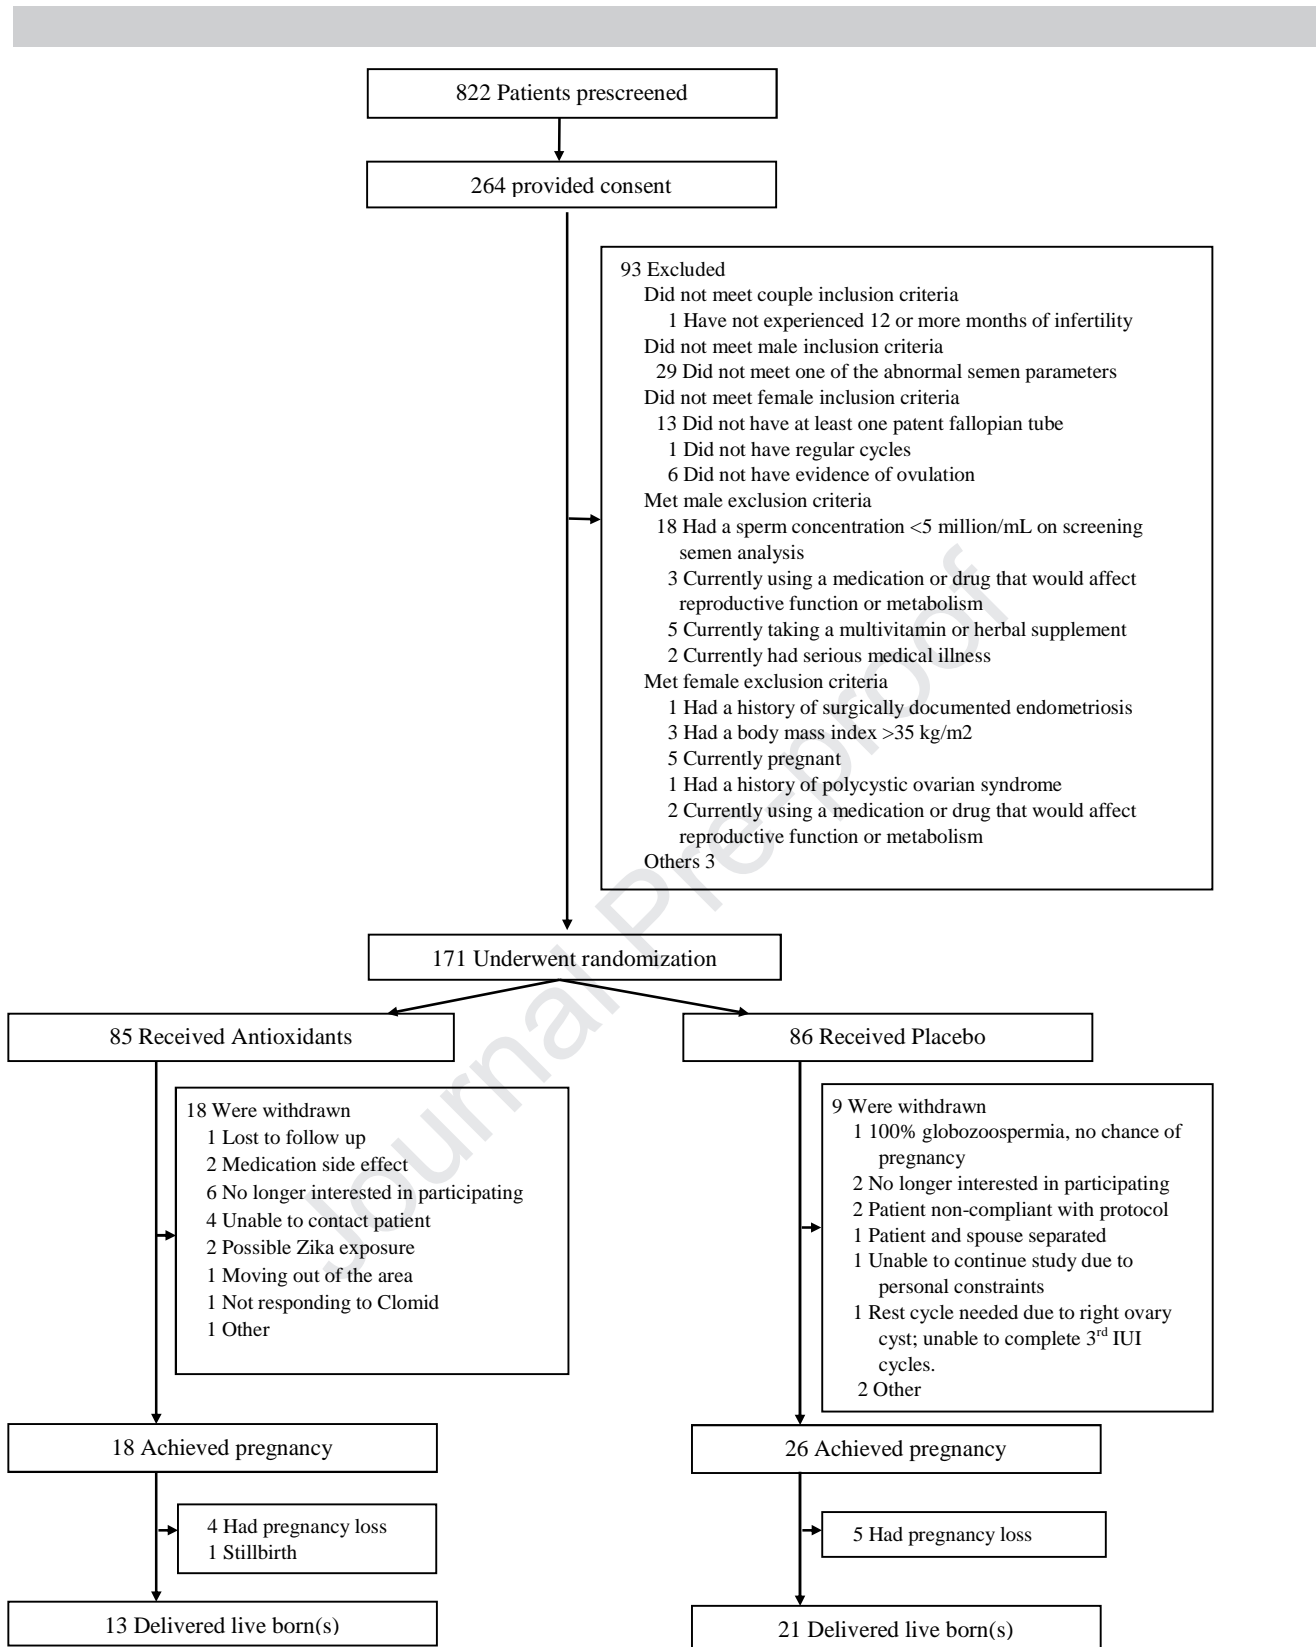

Supplement: NIHMS1545844-supplement-1.pdf [file NIHMS1545844-supplement-1.pdf]
